# Supplementary material for: Bacteriophage-Induced Lipopolysaccharide Mutations in Escherichia coli Lead to Hypersensitivity to Food Grade Surfactant Sodium Dodecyl Sulfate
Source: MDPI journal article supplement (doi:10.3390/antibiotics9090552), 2020-08-28
Supplement: s1 [file s1]

## Supplemental Materials

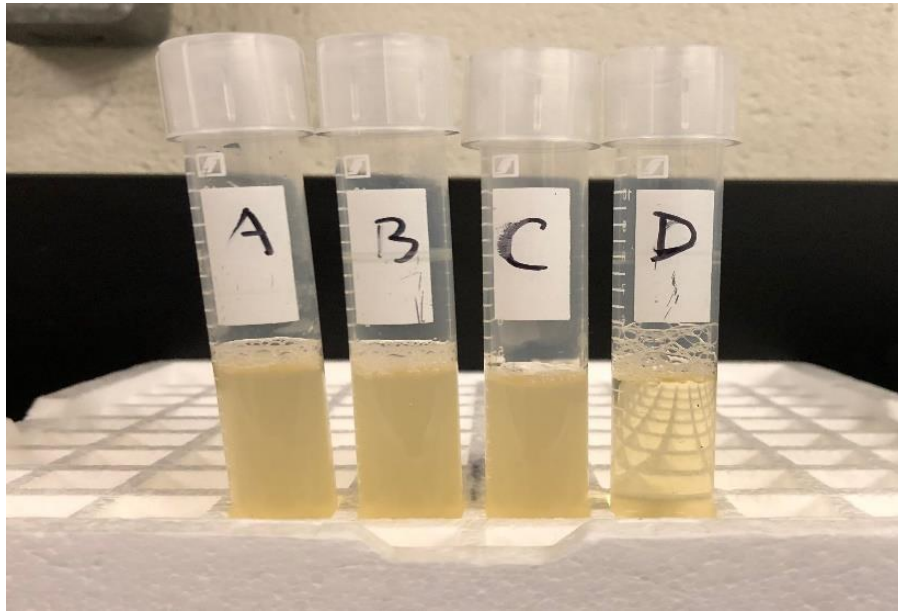

**Figure S1.** Visual appearances of four settings in phage resistance inhibition tests.

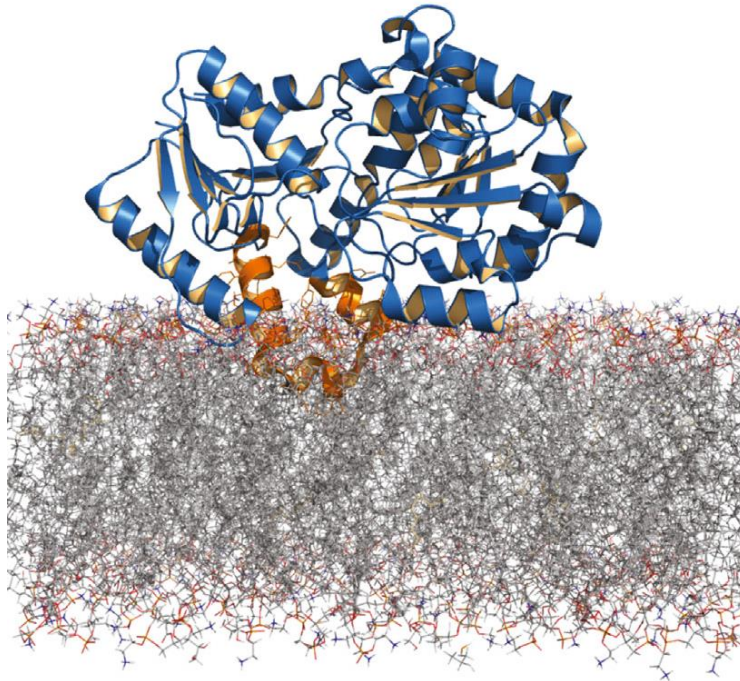

**Figure S2.** Model of WaaG from *Escherichia coli* K-12 anchoring to simulated membrane (grey). Crystal structure of glycosyltransferase waaG (PDB accession number 2IW1) is in blue and MIR-waaG is in orange. This figure was adapted from Liebau et al.
